# Supplementary material
Source: Springer Nature journal article supplement (https://www.springermedizin.de/resource/supplementary/12886_2011_211_MOESM5_ESM.pdf/9473532)
Supplement: MOESM5 [file 9473532]

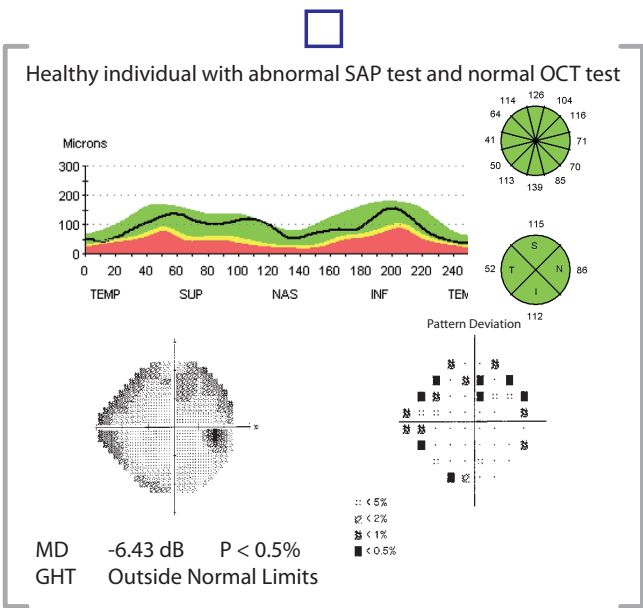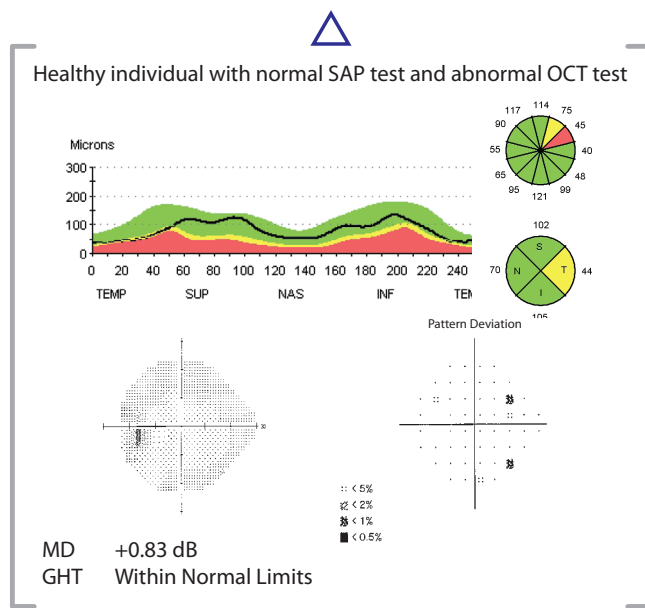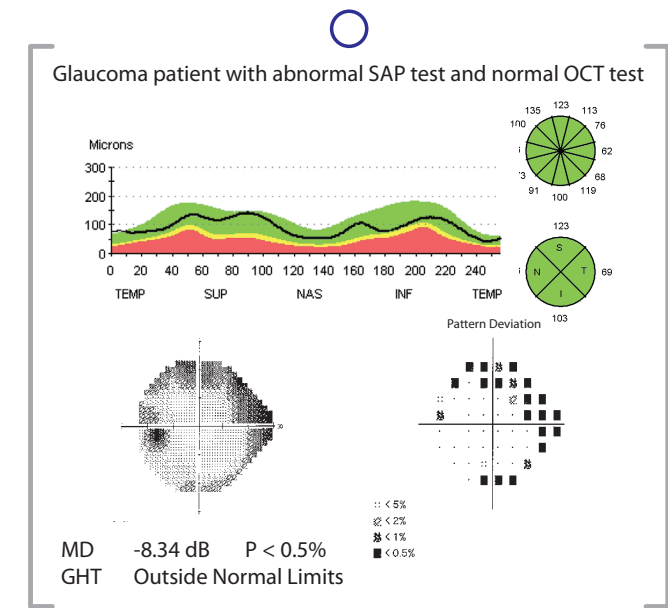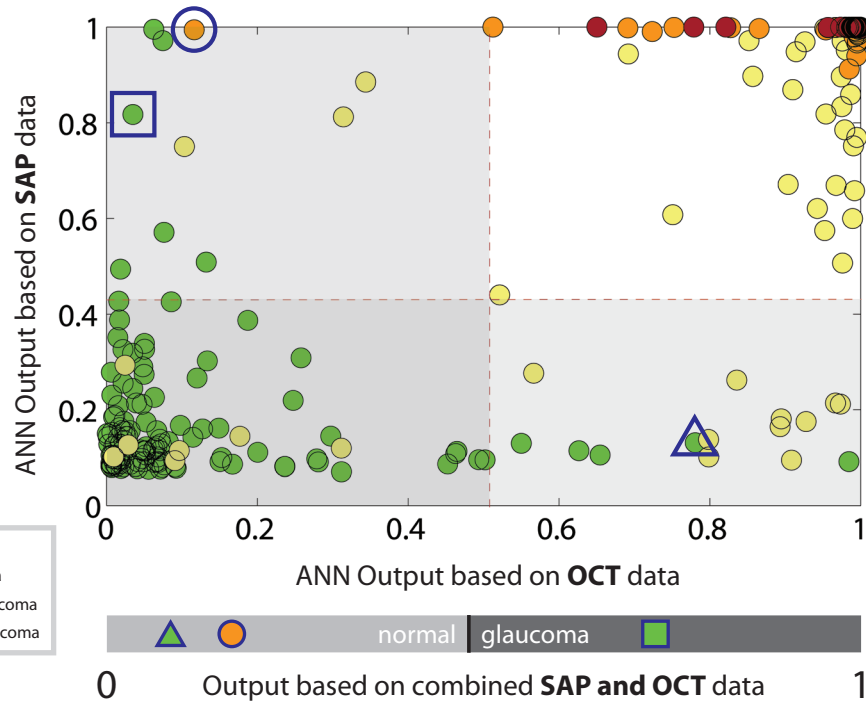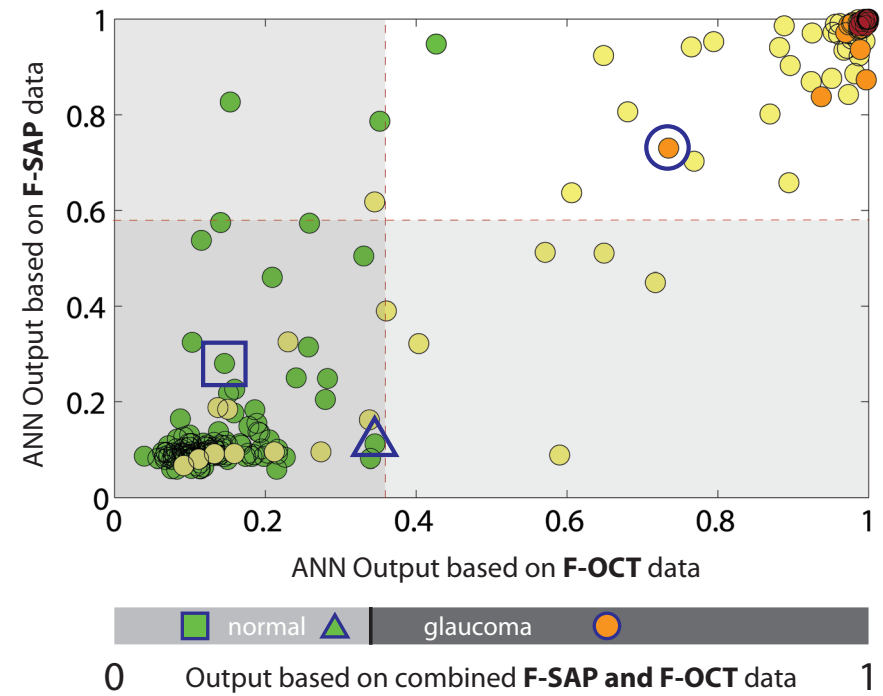

**SAP** data: Standard Automated Perimetry data, based on Pattern Deviation (PD) probability scores

**F-SAP** data: Fused SAP data, based on weighted transformation of PD probability scores with OCT-derived probability scores

**OCT** data: Age and refraction- corrected Optical Coherence Tomography A-scan data, optimized by principal component analysis (PCA)

**F-OCT** data: Fused OCT data, based on weighted transformation of A-scan data with PD probability scores and optimized by PCA
